# Supplementary material for: The Relationship between Binge Drinking and Binge Eating in Adolescence and Youth: A Systematic Review and Meta-Analysis
Source: MDPI journal article supplement (doi:10.3390/ijerph20010232), 2022-12-23
Supplement: s1 [file s1]

**Table S1.** Studies selected for correlation coefficient

| #  | Study                               | Sample size                           | Age                                     | Nationality | BE instrument                                 | BD instrument                                                                          | Correlation coefficient                                                                                  |
|----|-------------------------------------|---------------------------------------|-----------------------------------------|-------------|-----------------------------------------------|----------------------------------------------------------------------------------------|----------------------------------------------------------------------------------------------------------|
| 1  | Benjamin & Wulfert (2005) [115]     | N = 335 (100% women)                  | Undergraduate students. Mean age: 19.6  | USA         | QEWPR                                         | Abbreviated version of the CORE Alcohol and Drug Survey                                | The frequencies of eating binges and alcohol use occasions were correlated $r = 0.25, p < 0.001$         |
| 2  | Cusack et al. (2021) [116]          | N = 1,072 (100% women)                | Undergraduate students. Mean age: 19.47 | USA         | EDE-Q Total Score                             | Above AUDIT cut-off                                                                    | Partial correlation (binge eating - frequency of morning drinking) $r = -0.02$                           |
| 3  | Escrivá-Martínez et al. (2020) [25] | N = 428 (24.3% men and 75.7% women)   | Undergraduate students. Mean age 21.67  | Spain       | Binge Eating Scale (BES)                      | Item 3 on the AUDIT scale ( $\geq 6$ drinks on one occasion in the past year)          | $r = 0.226 (p < 0.001)$                                                                                  |
| 4  | Horvath et al. (2021) [117]         | N = 88 (100% men)                     | Mean age: 19                            | USA         | EPSI binge eating score                       | AUDIT                                                                                  | Nonsignificant bivariate correlation between AUDIT and EPSI binge eating score ( $r = 0.19; p > 0.05$ ). |
| 5  | Inguglia et al. (2019a) [118]       | N = 944 (43% boys and 57% girls)      | 14-21. Mean age: 16.35                  | Italy       | BES                                           | AUDIT-3                                                                                | $r = 0.11; p < 0.01$                                                                                     |
| 6  | Inguglia et al. (2019b) [119]       | N = 570 (46% boys and 54% girls)      | 14-17. Mean age: 15.75                  | Italy       | BES                                           | AUDIT-3                                                                                | $r = 0.07; p > 0.05$ (nonsignificant)                                                                    |
| 7  | Laghi et al. (2012) [94]            | N = 1,350 (47% boys and 53% girls)    | 17-19. Mean age: 17.46                  | Italy       | BES. Score $\geq 18$ "binge eaters"           | $\geq 5$ drinks ( $\geq 4$ females) on one occasion in the past month                  | Alcohol use frequency and binge eating were significantly correlated $r = 0.31, p < .001$ .              |
| 8  | Laghi et al. (2020) [87]            | N = 1020 (50.6% boys and 49.4% girls) | 16-22. Mean age: 17.9                   | Italy       | BES. Score $\geq 17$ "binge eaters"           | $\geq 5$ drinks ( $\geq 4$ females) on one occasion in the past 15 days and past month | Binge eating scale was correlated to binge drinking ( $r = 0.08; p < 0.05$ )                             |
| 9  | Martin et al. (2015) [120]          | N = 153 (100% women)                  | Mean age: 19.72                         | USA         | EDDS for Binge Eating Disorder (BED) symptoms | DDQ. $\geq 5$ drinks in the past two weeks                                             | Nonsignificant correlation between binge drinking and binge eating disorder $r = -0.13; p > 0.05$        |
| 10 | Rolland et al. (2017) [27]          | N = 1,872 (42.6% men and 57.4% women) | 20-23. Mean age: 21                     | France      | Items 13, 14, and 15 of the EDE-Q, BE score   | AUQ. BD score                                                                          | Rho de Spearman $\rho = 0.12; p < 0.001$ .                                                               |

AUQ = Alcohol Use Questionnaire (AUQ); DDQ = Daily Drinking Questionnaire; EDDS = The 22-item Eating Disorder Diagnostic Scale; EDE-Q = Eating Disorder Examination Questionnaire; QEWPR = Modified version of the 28-item Questionnaire on Eating and Weight Patterns-Revised

**Table S2.** Studies selected for odds ratio

| # | Study                         | Sample size                             | Age                   | Nationality | BE instrument                                                                                                                                                                                              | BD instrument                                                        | Coefficient                                                                                                                                                                                                                                                                                                   |
|---|-------------------------------|-----------------------------------------|-----------------------|-------------|------------------------------------------------------------------------------------------------------------------------------------------------------------------------------------------------------------|----------------------------------------------------------------------|---------------------------------------------------------------------------------------------------------------------------------------------------------------------------------------------------------------------------------------------------------------------------------------------------------------|
| 1 | Bui et al. (2021) [122]       | N = 18,461 (48.5% boys and 51.5% girls) | 11-18. Mean age: 14.9 | Taiwanese   | Emotional eating with two questions: In the past week, (1) how many times did you eat to reward yourself or celebrate? (2) How many times did you console yourself when feeling sad or stressed by eating? | >5 drinks on one occasion for at least one day during the past month | Subjects with binge drinking behavior were more likely to report frequent consumption of desert foods compared to participants who did not binge drink (OR = 1.24, 95% CI: 1.07–1.44).                                                                                                                        |
| 2 | Field et al. (2014) [39]      | N = 5527 (100% boys)                    | 12-18. Mean age: 14.9 | USA         | Binge eating at least 1/month and purged less than monthly (Binge Eating Disorder)                                                                                                                         | ≥ 12 episodes of binge drinking per year                             | OR: 1.04 (0.55–1.98). 12-year prospective association between binge eating disorder and risk of developing binge drinking                                                                                                                                                                                     |
| 3 | Koupil et al. (2016) [123]    | N = 12,599 (100% women)                 | 18-23. Mean age: 20.8 | Australia   | DSM-IV: Binge eating (episodes of overeating with lost control)                                                                                                                                            | Binge alcohol consumption was registered as 'at least once a week'   | Relative risk ratios for alcohol binge drinking in a multivariate analysis adjusted for age at start of follow-up of transient binge eating was 1.27 and 1.69 for persistent binge eating                                                                                                                     |
| 4 | Micali et al. (2015) [42]     | N = 11,209 (42.9% boys and 57.1% girls) | Mean age: 14.57       | UK          | Binge Eating Disorder (BED) according to DSM-5 criteria                                                                                                                                                    | AUDIT-3                                                              | OR: 1.41 (0.68-2.93). Nonsignificant. BED Vs Binge drinking                                                                                                                                                                                                                                                   |
| 5 | Sonneville et al. (2013) [41] | N = 16,882 (46.5% boys and 53.5% girls) | 9-14. Mean age: 11    | UK          | Binge Eating Disorder (BED) following DSM-5                                                                                                                                                                | Frequency cutoff of at least 6 episodes of binge drinking per year   | Age and Sex-adjusted OR: 1.38 (1.06, 1.80). Fully adjusted OR: 1.14 (0.83, 1.57). Nonsignificant. Binge eating Vs frequent binge drinking. Binge eating was not associated with the onset of frequent binge drinking among either females (OR=1.15, 95% CI=0.83, 1.59) or males (OR=1.13, 95% CI=0.36, 3.55). |
